# Supplementary material for: Snapshots of a Non-Canonical RdRP in Action
Source: MDPI journal article supplement (doi:10.3390/v13071260), 2021-06-28
Supplement: s1 [file s1]

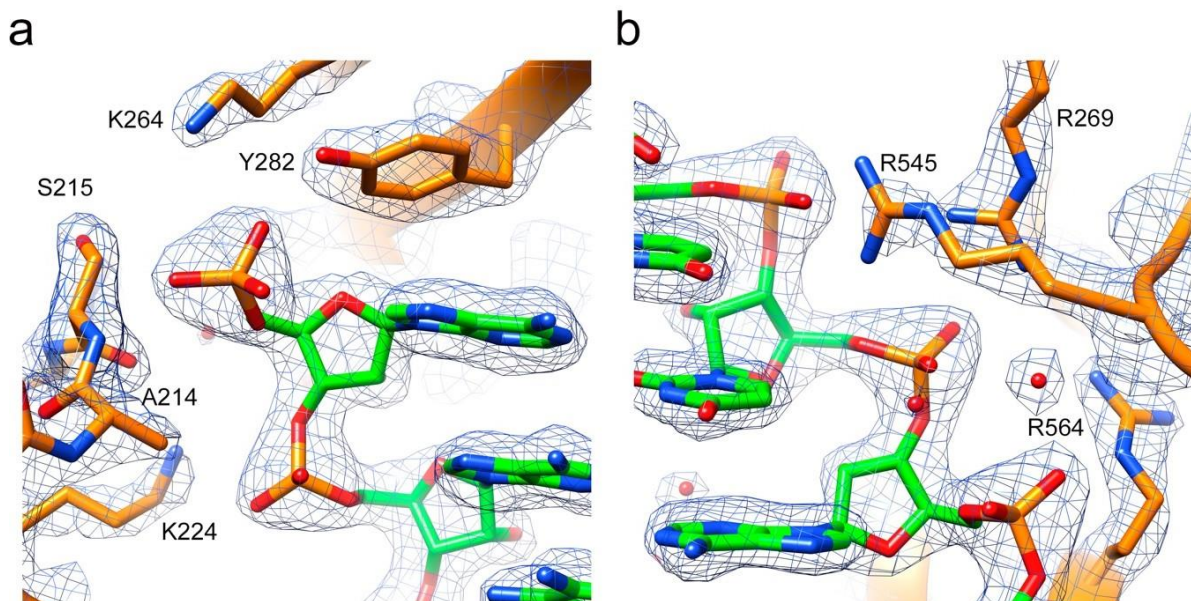

**Figure S1.** Interactions involving the phosphodiester backbone of the RNA template/primer. (a) Interactions in the template entry channel of TaV<sub>pol</sub>. Only the nucleotides A+1 and A0 have been represented in contact with the main chain residue S215 of motif G (A+1) and with the basic side chains K264 (A+1) and K224 (A0) of motifs F and G, respectively. (b) The phosphodiester backbone of the primer strand is mainly recognized by residues R269 in motif F(U-3) and R545 (U-2) and R564 (A-4) of the thumb subdomain. The 2Fo-Fc electron density map around the region is displayed at a contour of  $1.5\sigma$  (cyan mesh).

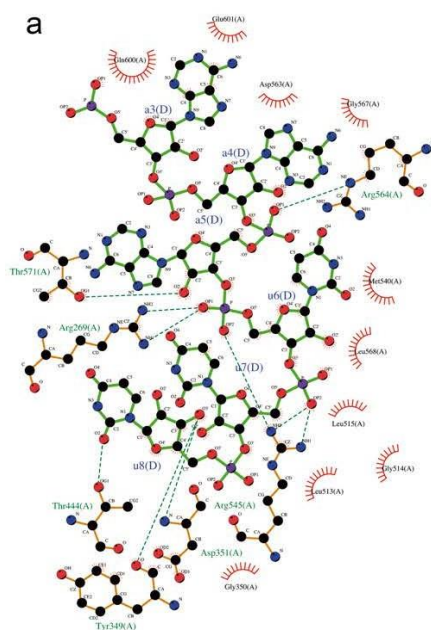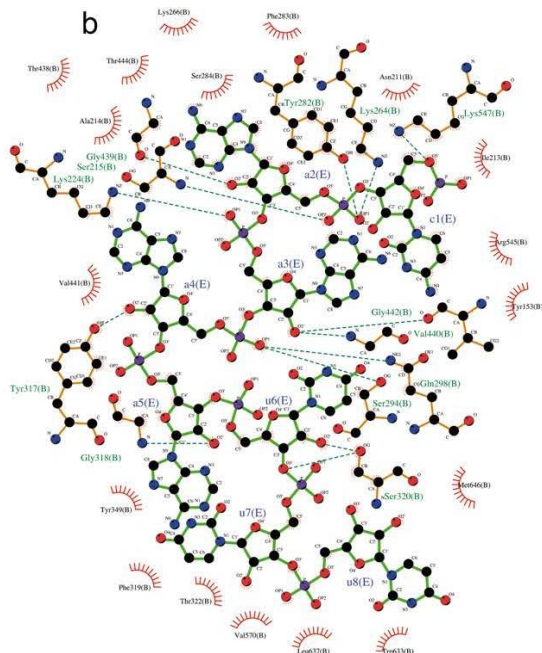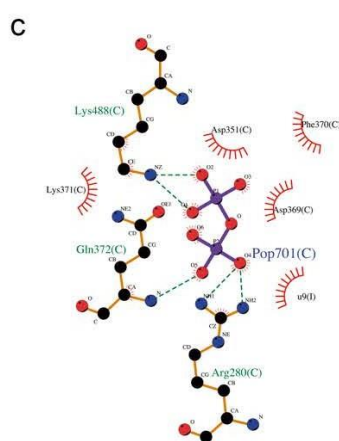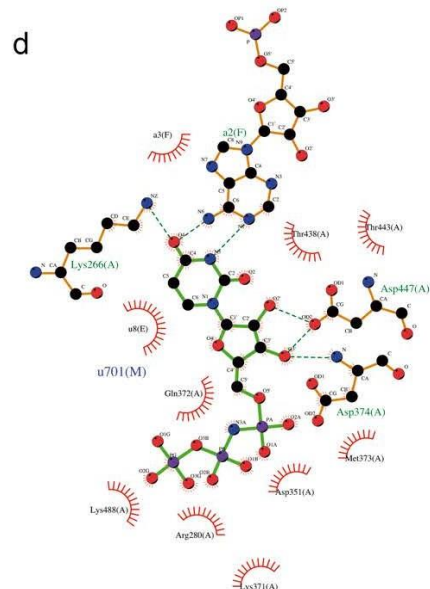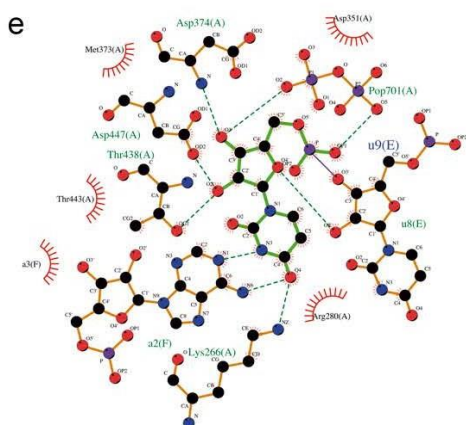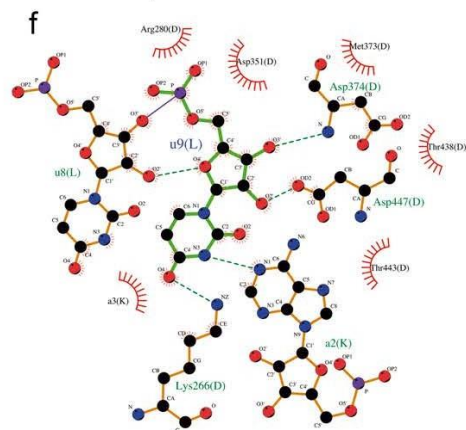

**Figure S2.** Interaction between TaV<sub>pol</sub> and the different ligands (a) Contacts between TaV<sub>pol</sub> and the RNA primer in the binary complex.(b) Contacts between TaV<sub>pol</sub> and the RNA primer in the binary complex. (c) Interaction involving the pyrophosphate molecule (PPi) in a ternary complex. (d) Interaction with nucleotide analogue UMPNPP. (e) Contacts involving the UMP molecule newly incorporated to the RNA product before ppi release. (f) Contacts involving the UMP molecule newly incorporated to the RNA product before ppi release after PPI. Hydrogen bonds are indicated as dashed lines, hydrophobic contacts are represented by an arc with spokes radiating towards the ligand atoms they contact. The contacted atoms are shown with spokes radiating back. Chain name is indicated in parenthesis and nucleotide residue with lower case letter followed by its position number. Bonds in the RNA chains are depicted in green, phosphate atoms in purple, carbon atoms in black , oxygen atoms in red an nitrogen atoms in blue.

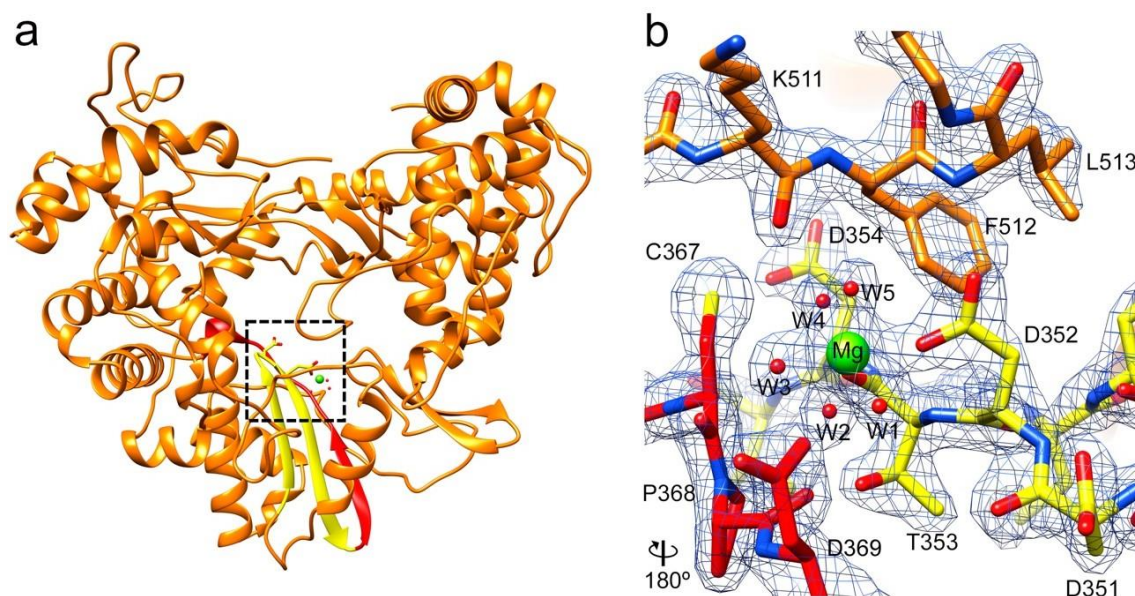

**Figure S3.** Interactions involving the non-catalytic  $Mg^{2+}$ . (A) Front view of the TaV<sub>pol</sub> structure (orange ribbons), highlighting the central  $\beta$ -sheet of the palm subdomain (yellow and red strands), the motif C aspartates (atom type sticks) and the non-catalytic  $Mg^{2+}$  (green sphere). (B) Close up of residues in close contact to the non-catalytic  $Mg^{2+}$ .



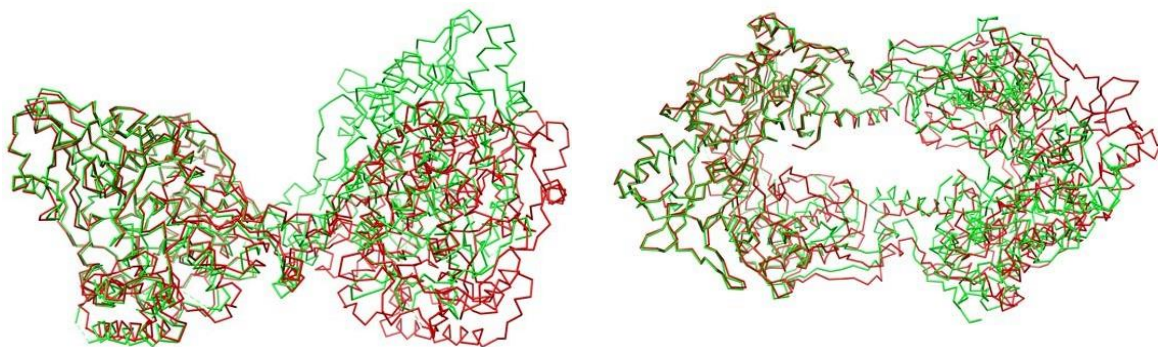

**Figure S4.** Superimpositions of RNA-bound and motif F-moved forms of  $\Delta 10\text{-TaV}_{\text{pol}}\Delta 607\text{-}624$ . The RNA-bound form is shown in red and the motif F-moved form of  $\text{TaV}_{\text{pol}}$  in green. One monomer of the motif F-moved form shows a  $\sim 25^\circ$  hinge rotation with respect to the same position in the RNA-bound form.

**Table S1.** Contact distances between the TaV<sub>pol</sub> residues and the template-primer RNA in the structure of the binary complex (PDB: 7OM6). The specific atoms involved in contacts are shown in brackets. Only H-bonds and salt bridges are considered.

| PDB code |                     | RNA nucleotide [Atom] | Distance (Å) | TaVpol residue [Atom] |
|----------|---------------------|-----------------------|--------------|-----------------------|
| 7OM6     | Primer RNA strand   | U7[OP2]               | 3.87         | ARG269[NH1]           |
|          |                     | U6[OP1]               | 3.03         | ARG269[NH1]           |
|          |                     | U6[OP1]               | 2.80         | ARG269[NH2]           |
|          |                     | U8[O3']               | 3.01         | ASP351[N]             |
|          |                     | U8[O2]                | 3.28         | THR444[OG1]           |
|          |                     | U7[O3']               | 3.84         | GLY514[N]             |
|          |                     | U7[OP2]               | 3.21         | ARG545[NH1]           |
|          |                     | U6[O5']               | 3.19         | ARG545[NH2]           |
|          |                     | U7[OP2]               | 3.00         | ARG545[NH2]           |
|          |                     | U6[OP2]               | 3.17         | ARG545[NH2]           |
|          |                     | A5[OP1]               | 2.94         | ARG564[NE]            |
|          |                     | U6[O4']               | 3.64         | THR571[OG1]           |
|          |                     | A5[O2']               | 2.74         | THR571[OG1]           |
|          | Template RNA strand | C1[N4]                | 3.32         | ARG545[O]             |
|          |                     | C1[O5']               | 3.00         | LYS547[NZ]            |
|          |                     | C1[O4']               | 3.73         | LYS547[NZ]            |
|          |                     | C1[O3']               | 3.68         | TYR282[OH]            |
|          |                     | A2[OP1]               | 2.67         | TYR282[OH]            |
|          |                     | A2[OP1]               | 3.04         | LYS264[NZ]            |
|          |                     | A2[OP2]               | 3.01         | SER215[N]             |
|          |                     | A2[O3']               | 3.66         | LYS224[NZ]            |
|          |                     | A3[OP1]               | 3.77         | THR210[OG1]           |
|          |                     | A3[OP1]               | 2.89         | LYS224[NZ]            |
|          |                     | A3[O2']               | 3.19         | GLY442[N]             |
|          |                     | A3[O2']               | 3.89         | THR443[N]             |
|          |                     | A4[OP1]               | 2.88         | GLN298[NE2]           |
|          |                     | A4[OP1]               | 2.77         | SER294[OG]            |
|          |                     | A4[O3']               | 3.53         | TYR317[OH]            |
|          |                     | A4[O2']               | 2.70         | TYR317[OH]            |
|          |                     | U6[O2']               | 2.82         | SER320[OG]            |

**Table S2.** Description of TaV<sub>pol</sub> and Uridine-5'-[( $\alpha,\beta$ )-imido]triphosphate (UMPNPP) contacts mediated by hydrogen bonds.

| PDB code | UMPNPP [Atom]    | Distance (Å) | TaVpol residue [Atom] |
|----------|------------------|--------------|-----------------------|
| 7OM7     | UMPNPP 701[O2 '] | 3.45         | THR438[OG1]           |
|          | UMPNPP 701[O3 '] | 2.99         | ASP374[N]             |
|          | UMPNPP 701[O4]   | 2.79         | LYS266[NZ]            |
|          | UMPNPP 701[O2 '] | 2.96         | ASP447[OD2]           |
|          | UMPNPP 701[O3 '] | 2.65         | ASP447[OD2]           |

**Table S3.** Hydrogen bonding contacts between TaV<sub>pol</sub> and the elongated RNA strand found in the ternary complex, in the post catalytic state. Contacts involving the incorporated UTP(9) are highlighted in blue.

| PDB code |                     | RNA nucleotide [Atom] | Distance (Å) | TaVpol residue [Atom] |
|----------|---------------------|-----------------------|--------------|-----------------------|
| 7OMA     | Primer RNA strand   | A5[O2']               | 2.66         | THR571[OG1]           |
|          |                     | A5[O2']               | 3.41         | LEU568[N]             |
|          |                     | U6[OP1]               | 2.61         | ARG269[NH2]           |
|          |                     | U6[O4']               | 3.88         | THR571[OG1]           |
|          |                     | U7[OP2]               | 3.54         | ARG545[NH1]           |
|          |                     | U7[OP2]               | 3.70         | ARG545[NH2]           |
|          |                     | U7[O2]                | 3.14         | TYR349[OH]            |
|          |                     | U8[O2]                | 3.52         | THR444[OG1]           |
|          |                     | U9[OP2]               | 3.66         | ARG280[NH2]           |
|          |                     | U9[O3']               | 3.66         | ASP374[N]             |
|          |                     | U9[O2']               | 2.76         | THR438[OG1]           |
|          | Template RNA strand | C1[N4 ]               | 3.74         | TYR153[OH]            |
|          |                     | C1[ OP1]              | 3.87         | LYS264[NZ]            |
|          |                     | C1[ OP2]              | 3.58         | SER215[N]             |
|          |                     | C1[ O3']              | 3.67         | TYR282[OH]            |
|          |                     | A2[ OP1]              | 2.97         | TYR282[OH]            |
|          |                     | A2[ OP1]              | 2.78         | LYS264[NZ]            |
|          |                     | A2[ OP2]              | 2.66         | SER215[N]             |
|          |                     | A2[ O3']              | 3.76         | LYS224[NZ]            |
|          |                     | A3[ OP1]              | 2.44         | LYS224[NZ]            |
|          |                     | A3[ OP1]              | 3.34         | THR210[OG1]           |
|          |                     | A3[ O2']              | 2.95         | GLY442[N]             |
|          |                     | A4[ OP1]              | 2.94         | SER294[OG]            |
|          |                     | A4[ OP1]              | 2.97         | GLN298[NE2]           |
|          |                     | A4[ O3']              | 3.38         | TYR317[OH]            |
|          |                     | A4[ O2']              | 2.42         | TYR317[OH]            |
|          |                     | U6[ O2']              | 2.76         | SER320[OG]            |

**Table S4.** Polar interactions established between the TaV<sub>pol</sub> residues and the PPI by-product found in the ternary complex, in the in post catalytic state.

| PDB code | Molecule PPI [Atom] | Distance (Å) | TaV <sub>pol</sub> residue [Atom] |
|----------|---------------------|--------------|-----------------------------------|
| 7OMA     | POP701[O1]          | 3.88         | GLN372[N ]                        |
|          | POP701[O1]          | 3.20         | LYS488[NZ]                        |
|          | POP701[O2]          | 2.96         | LYS488[NZ]                        |
|          | POP701[O4]          | 2.45         | ARG280[NH2]                       |
|          | POP701[O5]          | 3.75         | ARG164[NH2]                       |
|          | POP701[O6]          | 3.63         | MET373[N]                         |
|          | POP701[O]           | 3.83         | ARG280[NH2]                       |
